# Supplementary material for: Evaluation of a mobile application tool (BiliNorm) to improve care for newborns with hyperbilirubinemia in Indonesia
Source: PubMed Central journal article supplement (PMC9202860; doi:10.1371/journal.pone.0269286), 2022-06-16
Supplement: pone.0269286.s001.pdf [file pone.0269286.s001.pdf]

**S1 Data. BiliNorm Questionnaire**

Please fill out and complete the questionnaire according to the information listed below:

**1 = Strongly disagree            5 = Slightly Agree**

**2 = Disagree                        6 = Agree**

**3 = Slightly Disagree            7 = Strongly Agree**

**4 = Neutral**

| <b>Point</b>       |                                                                                                               | <b>1</b> | <b>2</b> | <b>3</b> | <b>4</b> | <b>5</b> | <b>6</b> | <b>7</b> |
|--------------------|---------------------------------------------------------------------------------------------------------------|----------|----------|----------|----------|----------|----------|----------|
| <b>Utility</b>     |                                                                                                               |          |          |          |          |          |          |          |
| 1.                 | BiliNorm helps you to determine phototherapy in jaundiced babies                                              |          |          |          |          |          |          |          |
| 2.                 | BiliNorm helps you to pay more attention and be aware of Acute Bilirubin Encephalopathy                       |          |          |          |          |          |          |          |
| 3.                 | BiliNorm helps you to pay more attention and be aware of Kern Icterus                                         |          |          |          |          |          |          |          |
| 4.                 | BiliNorm helps you for better management of hyperbilirubinemia                                                |          |          |          |          |          |          |          |
| 5.                 | BiliNorm helps you provide better communication, information and education for parents and patients' families |          |          |          |          |          |          |          |
| 6.                 | BiliNorm helps you to do better patient follow-up                                                             |          |          |          |          |          |          |          |
| <b>Ease of use</b> |                                                                                                               |          |          |          |          |          |          |          |
| 1.                 | Learning how to use BiliNorm is easy                                                                          |          |          |          |          |          |          |          |
| 2.                 | BiliNorm easily understands what you want for better management of hyperbilirubinemia                         |          |          |          |          |          |          |          |
| 3.                 | BiliNorm is a clear and easy to understand                                                                    |          |          |          |          |          |          |          |
| 4.                 | BiliNorm is flexible                                                                                          |          |          |          |          |          |          |          |
| 5.                 | It is very easy for you to become proficient in using BiliNorm                                                |          |          |          |          |          |          |          |

|                                 |                                                                                                   |  |  |  |  |  |  |  |  |
|---------------------------------|---------------------------------------------------------------------------------------------------|--|--|--|--|--|--|--|--|
| 6.                              | BiliNorm is an easy-to-use application                                                            |  |  |  |  |  |  |  |  |
| <b>Subjective Norms</b>         |                                                                                                   |  |  |  |  |  |  |  |  |
| 1.                              | Your supervisor and other colleagues will think that BiliNorm is an important application         |  |  |  |  |  |  |  |  |
| 2.                              | The use of BiliNorm is important for your supervisor and other colleagues                         |  |  |  |  |  |  |  |  |
| 3.                              | If you stop using BiliNorm, this will not be a problem for your supervisor and other physicians   |  |  |  |  |  |  |  |  |
| 4.                              | Your supervisor and other colleagues hope that you will use BiliNorm in the future                |  |  |  |  |  |  |  |  |
| 5.                              | Your supervisor and other colleagues will be surprised if you stop using BiliNorm                 |  |  |  |  |  |  |  |  |
| 6.                              | Your supervisor and other colleagues will be disappointed if you stop using BiliNorm              |  |  |  |  |  |  |  |  |
| 7.                              | Your supervisor and other medical colleagues will make you feel guilty if you stop using BiliNorm |  |  |  |  |  |  |  |  |
| <b>Tendency to use BiliNorm</b> |                                                                                                   |  |  |  |  |  |  |  |  |
| 1.                              | You are likely to use BiliNorm in the next few months                                             |  |  |  |  |  |  |  |  |
| 2.                              | You predict that you will continue to use BiliNorm in the next few months                         |  |  |  |  |  |  |  |  |
| 3.                              | You plan to use BiliNorm in the next few months                                                   |  |  |  |  |  |  |  |  |
